# Supplementary material for: Human Transbodies to Reverse Transcriptase Connection Subdomain of HIV-1 Gag-Pol Polyprotein Reduce Infectiousness of the Virus Progeny
Source: MDPI journal article supplement (doi:10.3390/vaccines9080893), 2021-08-12
Supplement: s1 [file s1]

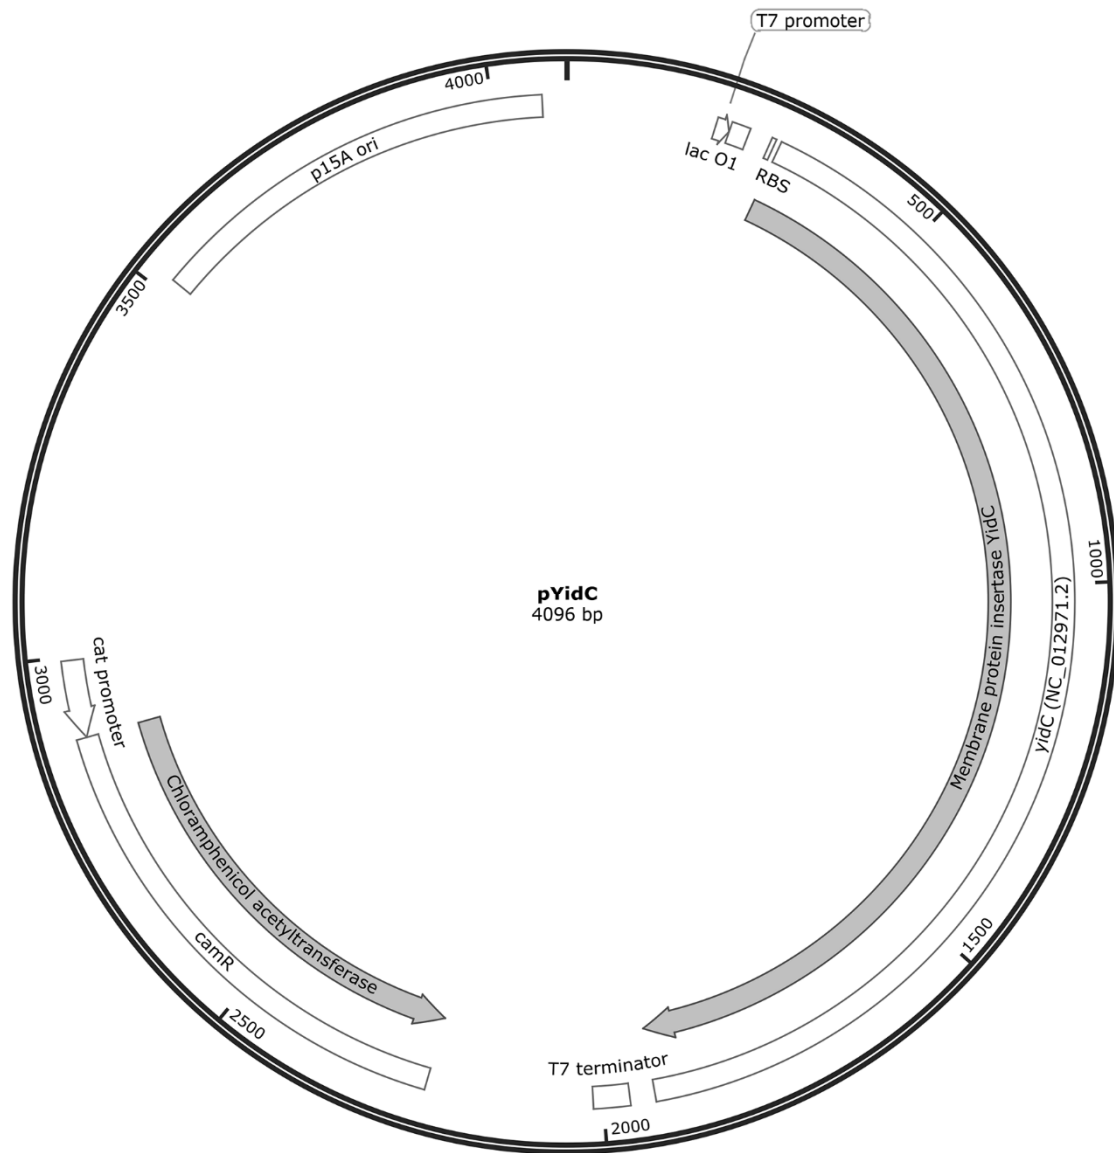

**Figure S1.** Circular map for pYidC. The vector is a 4096 bp-plasmid carrying *yidC* (accession number NC\_012971.2). Gene was cloned into pACYC backbone, which contains chloramphenicol selectable marker (*camR*). The p15A origin allows compatible coexistence with pET vectors and controls the copies number at 20 – 30 copies/cell.

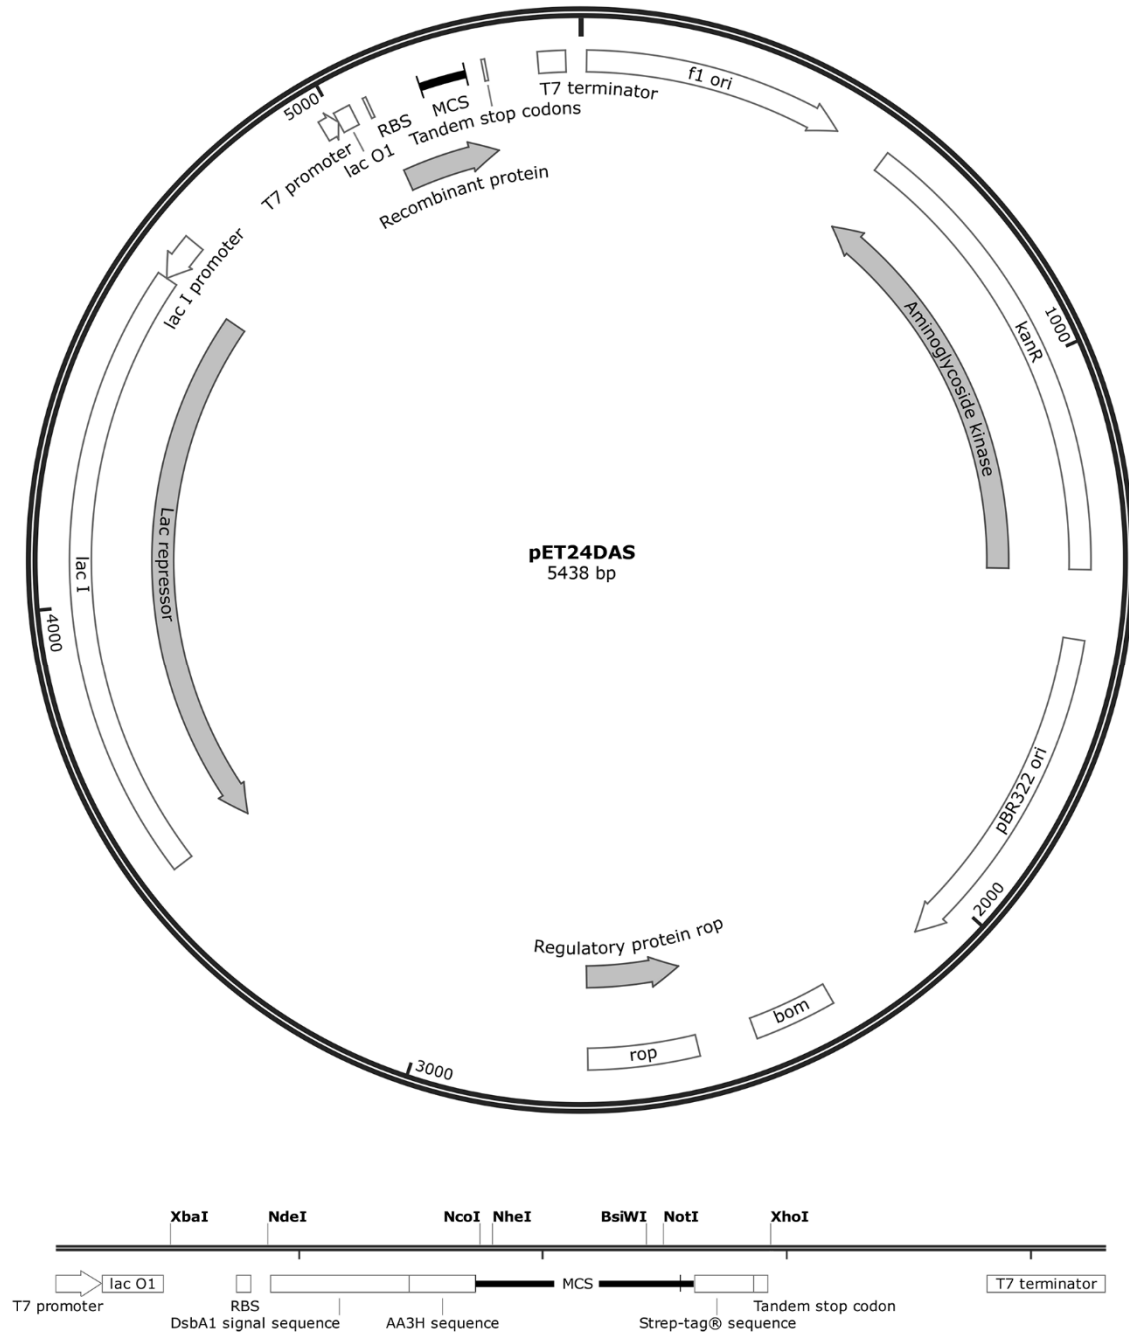

**Figure S2.** Circular map for pET24DAS. The empty vector is a 5438 bp-plasmid and the map is the same as pET24a(+) with the exception of the sequence between *NdeI* and *XhoI* restriction sites. In this study, the sequence between the *NdeI* and *XhoI* restriction sites was replaced by synthetic DNA encoding DsbA1 signal peptide, AA3H cell-penetrating peptide, multiple cloning site (MCS), Strep-tag II epitope, and tandem stop codons.

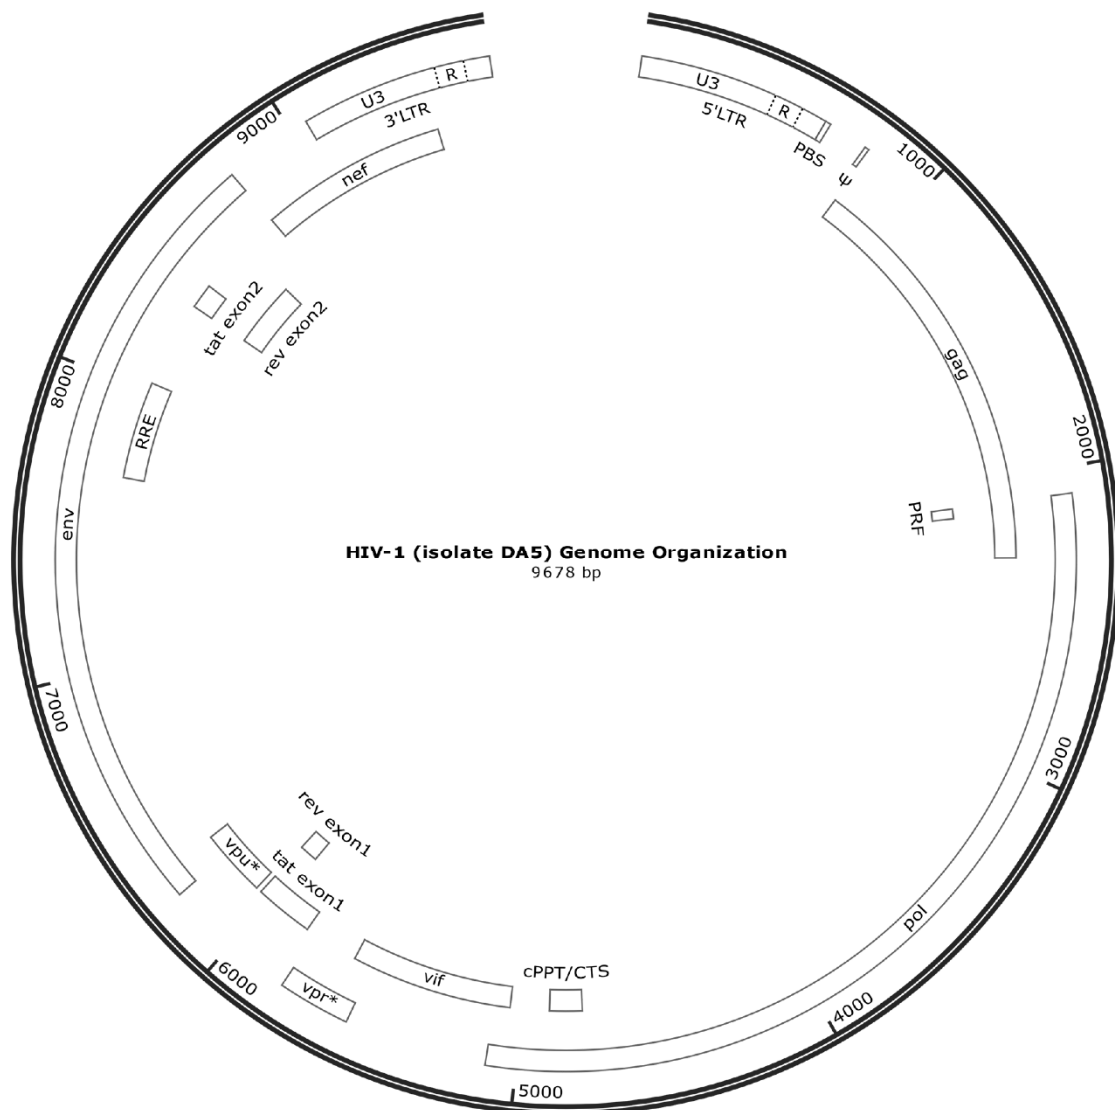

**Figure S3.** Circular map for HIV-1<sub>DA5</sub> genome organization acquired from de novo assembly. LTR, long terminal repeat; PBS, primer binding site; Ψ, Psi packaging element; PRF, programmed-1 ribosomal frameshifting; cPPT, central polypurine tract; CTS, central termination sequence; RRE, Rev response element.

\* indicates mutated *vpr/vpu*.

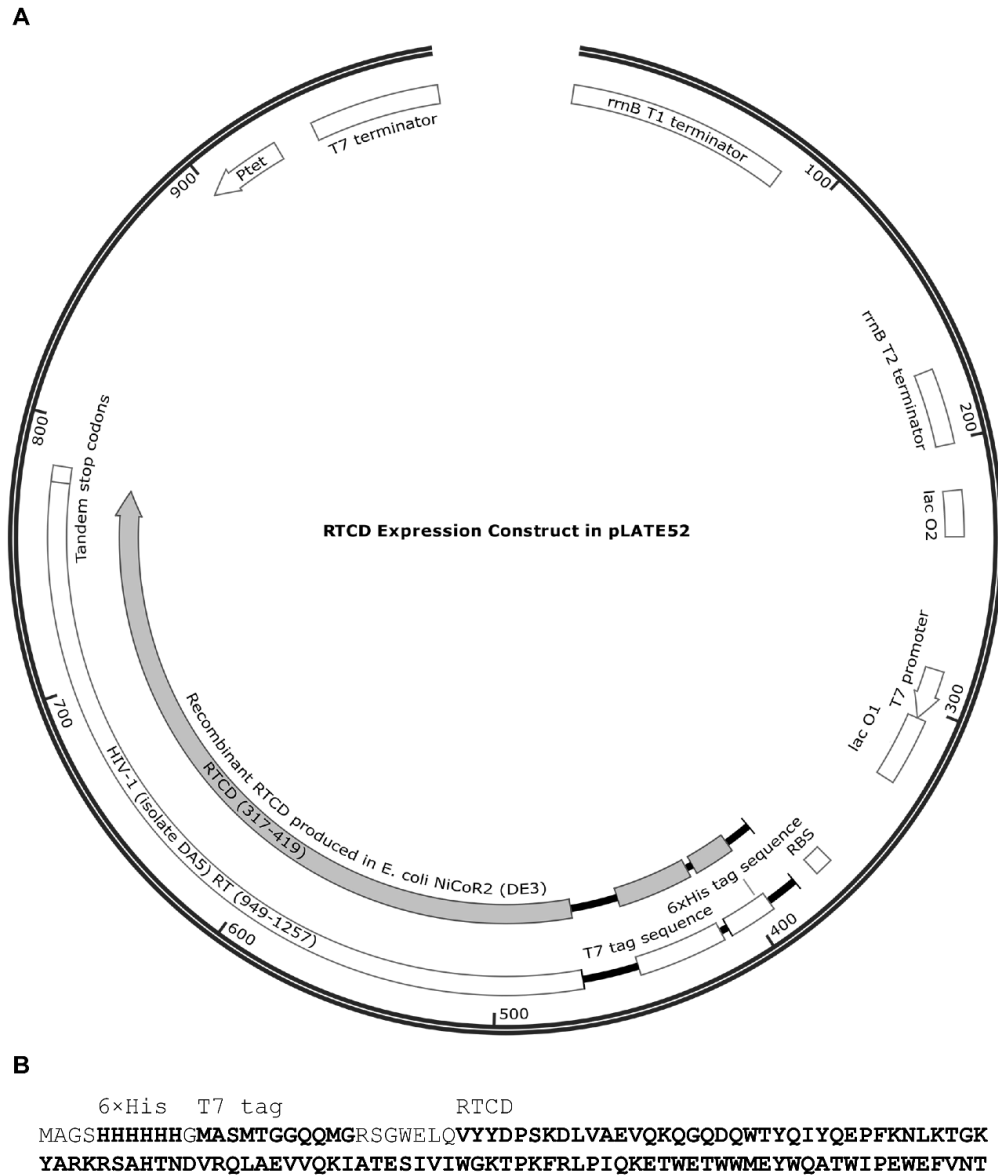

**Figure S4.** Recombinant RTCD expression cassette and its deduced polypeptide sequence. **(A)** Schematic diagram of recombinant RTCD expression cassette in pLATE52 vector. Basal level of expression was regulated by *lac* O1 and O2 franked to T7 promoter. Upstream *rrnBT1* and T2 terminators prevent a basal gene expression from vector derived promoter-like elements. Downstream of the cloning site is a constitutively induced weak *Tet* promoter ( $P_{tet}$ ) that operates anti-directionally to the T7 promoter, further reducing the basal expression. **(B)** Deduced polypeptide sequence of recombinant RTCD derived from the pLATE52-RTCD recombinant plasmid. The RTCD was tagged at N-terminus with 6× His and T7 epitope tags.

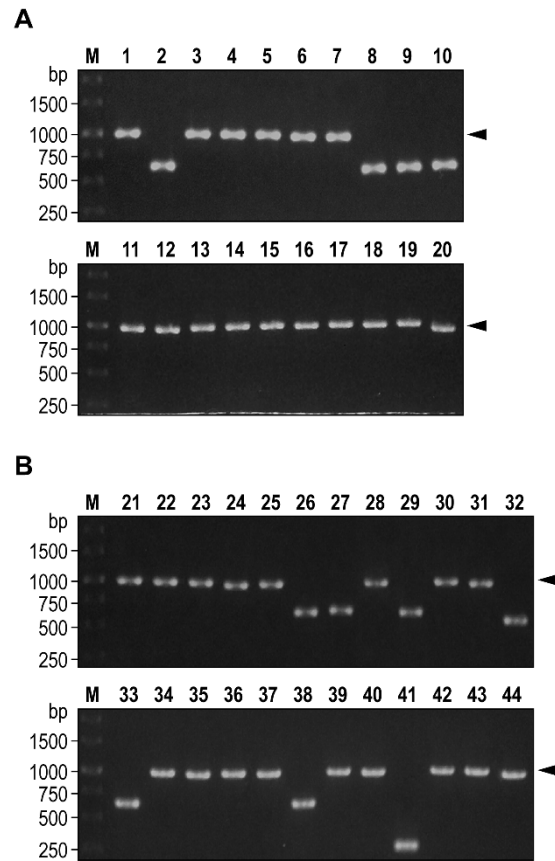

**Figure S5.** Direct PCR screening for RTCD-bound phages from *E. coli* clones. The phage transformed *E. coli* from two plates (**A** and **B**) that carried *huscfv*-sequences revealed PCR amplicons at about 1 kb (black arrowhead). Lanes M, 1 kb DNA ladder; lanes 1 – 44, phage transformed-*E. coli* clones no. 1-44.

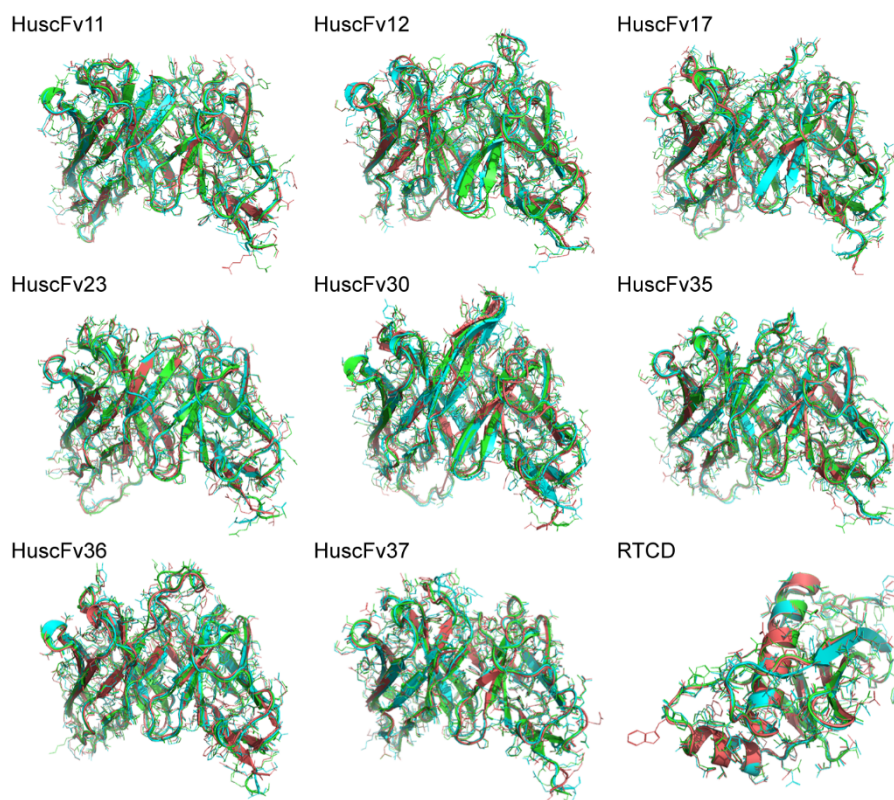

**Figure S6.** Superimposition of models derived from structure minimization methods carried out in this study. The models obtained from ModRefiner generate slightly deviated protein backbone. The models were further simulated to a native-like state by FG-MD, thus generated variations of side chain-rotameric state of the final models. The figures show structural alignment of model F1 (red), model F2 (green), and model F3 (cyan) from the selected HuscFvs and RTCD. All models were claimed to be energy minimized-near native state homology models.

**Table S1.** Specific primers for amplification of overlapped DNA segments of HIV-1<sub>DA5</sub> genome.

| Target        | Primer Name    | Sequence (5'–3')               |
|---------------|----------------|--------------------------------|
| <i>RU5-PR</i> | RU5-PR-forward | GGTCTCTCTTGTTAGACCAGG          |
|               | RU5-PR-reverse | GAAATTTAAAGTACAACCAATCTGAGTC   |
| <i>PR-IN</i>  | PR-IN-forward  | CCTCAAATCACTCTTTGGCAACGAC      |
|               | PR-IN-reverse  | CTAATCCTCATCCTGTCTACCTGCCAC    |
| <i>IN-NT</i>  | IN-NT-forward  | CAATGTCCAACAGGAATTTGGG         |
|               | IN-NT-reverse  | CTGCTTTGGTATAGGATTTTGATGATC    |
| <i>NT-CT</i>  | NT-CT-forward  | ATGGAGCTGGTAGATCCTAACCTAGAG    |
|               | NT-CT-reverse  | CTAAGCGCATGGATCTGTCTCTGC       |
| <i>CT-RU3</i> | CT-RU3-forward | CCATCATCAGAGGGAACCCGAC         |
|               | CT-RU3-reverse | CTCAAGGCAAGCTTTATTGAGGCTTTAAGC |

**Table S2.** Model scores of HuscFvs and HIV-1 RTCD obtained from I-TASSER.

| <b>Model</b> | <b>C-score</b> | <b>TM-score</b> | <b>RMSD</b>   | <b>No. of decoys</b> | <b>Cluster density</b> |
|--------------|----------------|-----------------|---------------|----------------------|------------------------|
| HuscFv11     | 0.96           | $0.84 \pm 0.08$ | $3.8 \pm 2.6$ | 9978                 | 0.6655                 |
| HuscFv12     | 0.89           | $0.83 \pm 0.08$ | $4.0 \pm 2.7$ | 10147                | 0.5652                 |
| HuscFv17     | 1.29           | $0.89 \pm 0.07$ | $3.2 \pm 2.3$ | 10125                | 0.8943                 |
| HuscFv23     | 1.29           | $0.89 \pm 0.07$ | $3.2 \pm 2.3$ | 10177                | 0.9154                 |
| HuscFv30     | 1.22           | $0.88 \pm 0.07$ | $3.4 \pm 2.4$ | 10178                | 0.8113                 |
| HuscFv35     | 1.30           | $0.89 \pm 0.07$ | $3.2 \pm 2.3$ | 10193                | 0.8766                 |
| HuscFv36     | 1.35           | $0.90 \pm 0.06$ | $3.1 \pm 2.2$ | 10190                | 0.8841                 |
| HuscFv37     | 1.27           | $0.89 \pm 0.07$ | $3.3 \pm 2.3$ | 10160                | 0.8156                 |
| RTCD         | 1.52           | $0.93 \pm 0.06$ | $1.2 \pm 1.2$ | 10200                | 1.0000                 |



**Table S3.** Model scores of HuscFvs and HIV-1 RTCD obtained from ModRefiner.

| Model    | RMSD  |       |       | TM-score |         |        |
|----------|-------|-------|-------|----------|---------|--------|
|          | M1    | M2    | M3    | M1       | M2      | M3     |
| HuscFv11 | 0.620 | 0.660 | 0.670 | 0.9906   | 0.9897  | 0.9891 |
| HuscFv12 | 0.542 | 0.709 | 0.690 | 0.9918   | 0.9877  | 0.9868 |
| HuscFv17 | 0.551 | 0.541 | 0.608 | 0.9917   | 0.9924  | 0.9916 |
| HuscFv23 | 0.740 | 0.636 | 0.696 | 0.9891   | 0.9916  | 0.9912 |
| HuscFv30 | 1.237 | 0.801 | 0.809 | 0.9670   | 0.9827  | 0.9858 |
| HuscFv35 | 0.591 | 0.566 | 0.517 | 0.9903   | 0.96916 | 0.9923 |
| HuscFv36 | 1.026 | 0.712 | 0.563 | 0.9819   | 0.9866  | 0.9914 |
| HuscFv37 | 0.651 | 0.424 | 0.748 | 0.9905   | 0.9949  | 0.9860 |
| RTCD     | 0.267 | 0.242 | 0.339 | 0.9950   | 0.9958  | 0.9933 |

**Table S4.** Comparison of docking members of the top-ranked clusters that were derived from each docking pairs.

| HuscFv | Docking pair* |       |       |       |       |       |       |       |       |
|--------|---------------|-------|-------|-------|-------|-------|-------|-------|-------|
|        | 1 – 1         | 1 – 2 | 1 – 3 | 2 – 1 | 2 – 2 | 2 – 3 | 3 – 1 | 3 – 2 | 3 – 3 |
| 11     | 82**          | 131   | 128   | 104   | 126   | 112   | 125   | 131   | 136   |
| 12     | 365           | 105   | 170   | 275   | 111   | 218   | 122   | 145   | 117   |
| 17     | 113           | 184   | 94    | 108   | 109   | 138   | 139   | 129   | 161   |
| 23     | 132           | 81    | 72    | 145   | 107   | 116   | 145   | 114   | 101   |
| 30     | 168           | 83    | 87    | 217   | 168   | 102   | 197   | 153   | 91    |
| 35     | 143           | 95    | 100   | 158   | 122   | 158   | 155   | 115   | 86    |
| 36     | 120           | 121   | 209   | 123   | 169   | 180   | 306   | 143   | 196   |
| 37     | 156           | 94    | 138   | 87    | 112   | 122   | 258   | 197   | 196   |

\* 1 – 1, docking between HuscFv model F1 and RTCD model F1; 1 – 2, docking between HuscFv model F1 and RTCD model F2; and so on.

\*\* Number of the docking member, which was obtained from the top-ranked docking cluster of ClusPro 2.0. The green numbers indicate the highest docking members in the clusters compared to other docking pairs.
